# Supplementary material
Source: PubMed Central journal article supplement (PMC2893265)
Supplement: NIHMS206170-supplement-01.pdf [file NIHMS206170-supplement-01.pdf]

## SUPPLEMENTARY MATERIAL

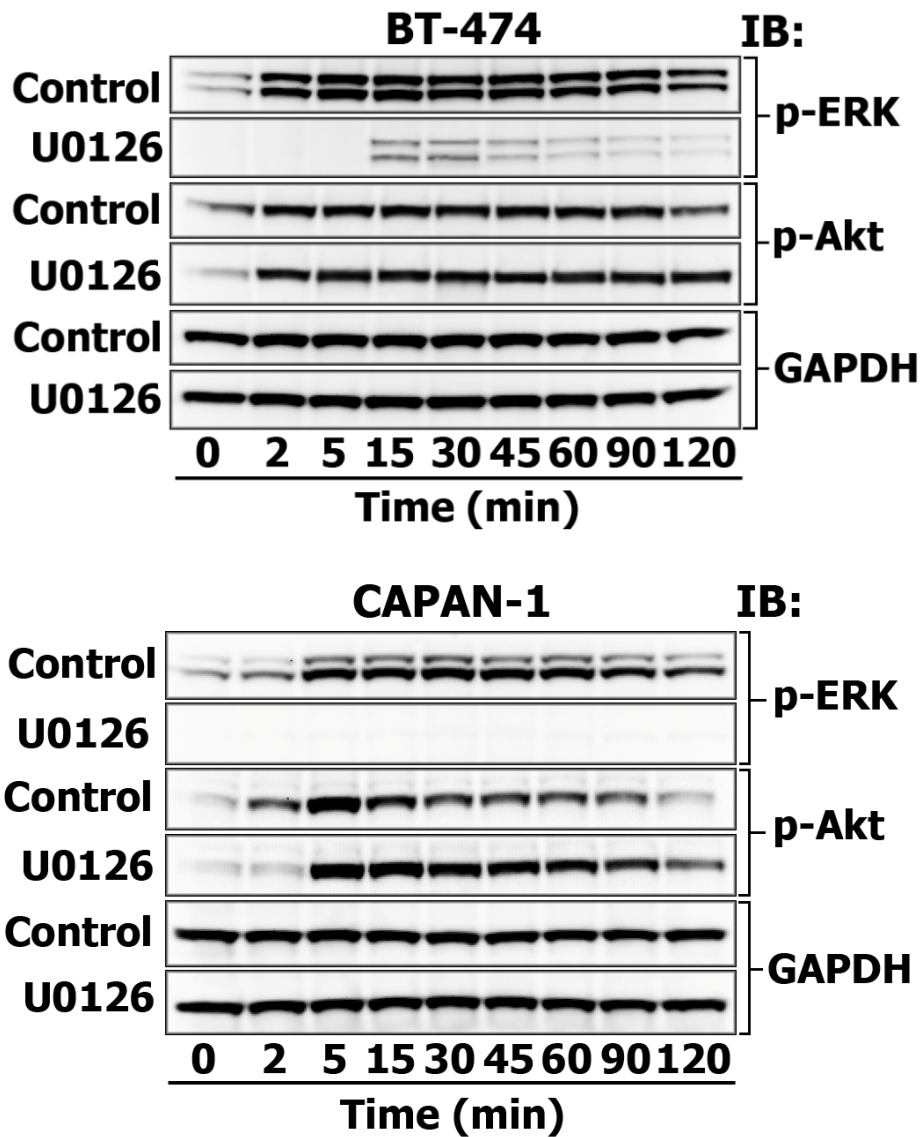

**Fig. 1S. Activation of ERK and Akt in the presence of MEK inhibitor U0126 in BT-474 (upper panel) and CAPAN-1 (lower panel) cells.** Serum-starved cells were either left untreated or treated with U0126 (10  $\mu$ M, 30 min) before stimulation with EGF (1 nM) for the indicated time intervals (min). Equal amounts of total cell lysates were resolved by NuPAGE and subjected to Multi-strip Western blotting. Immunoblots (**IB**) were probed with anti-phospho-p44/42 MAPK (Erk1/2) (Thr202/Tyr204), anti-phospho-Akt (S473) or anti-GAPDH (loading control) antibodies.

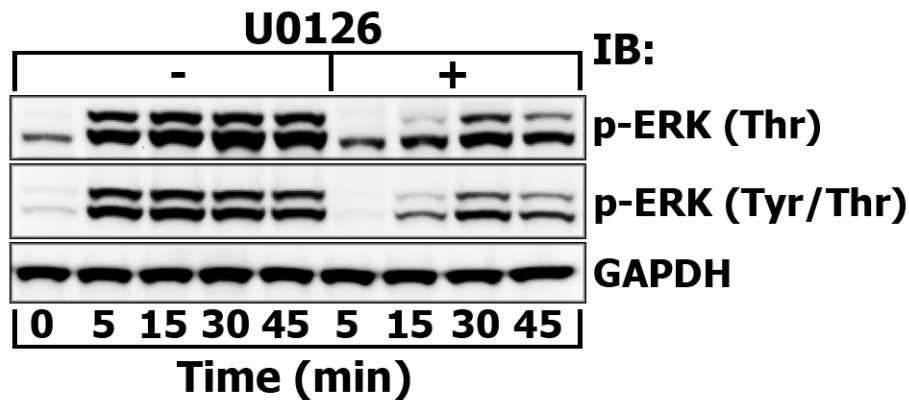

**Fig. 2S. ERK phosphorylation on Thr and Tyr residues in the presence of MEK inhibitor U0126.** Serum-starved T47D cells were either left untreated or treated with U0126 (10  $\mu$ M, 30 min) before stimulation with EGF (1 nM) for the indicated time intervals (min). Equal amounts of total cell lysates were resolved by NuPAGE and subjected to Western blotting. Immunoblots (IB) were probed with anti-phospho-p44/42 MAPK (Erk1/2) (Thr202/Tyr204), anti-phospho-ERK1/2 (Thr202) or anti-GAPDH (loading control) antibodies.

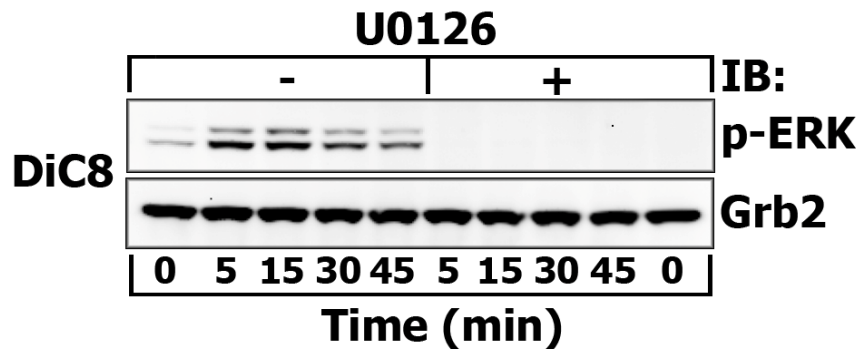

**Fig. 3S. PKC-mediated ERK phosphorylation requires MEK activity.** Serum-starved T47D cells were either left untreated or treated with U0126 (10  $\mu$ M, 30 min) before stimulation with 1,2-Dioleoyl-sn-glycerol (DiC8) (100  $\mu$ M) for the indicated time intervals (min). Equal amounts of total cell lysates were resolved by NuPAGE and subjected to Western blotting. Immunoblots (IB) were probed with anti-phospho-p44/42 MAPK (Erk1/2) (Thr202/Tyr204) or anti-Grb2 (loading control) antibodies.

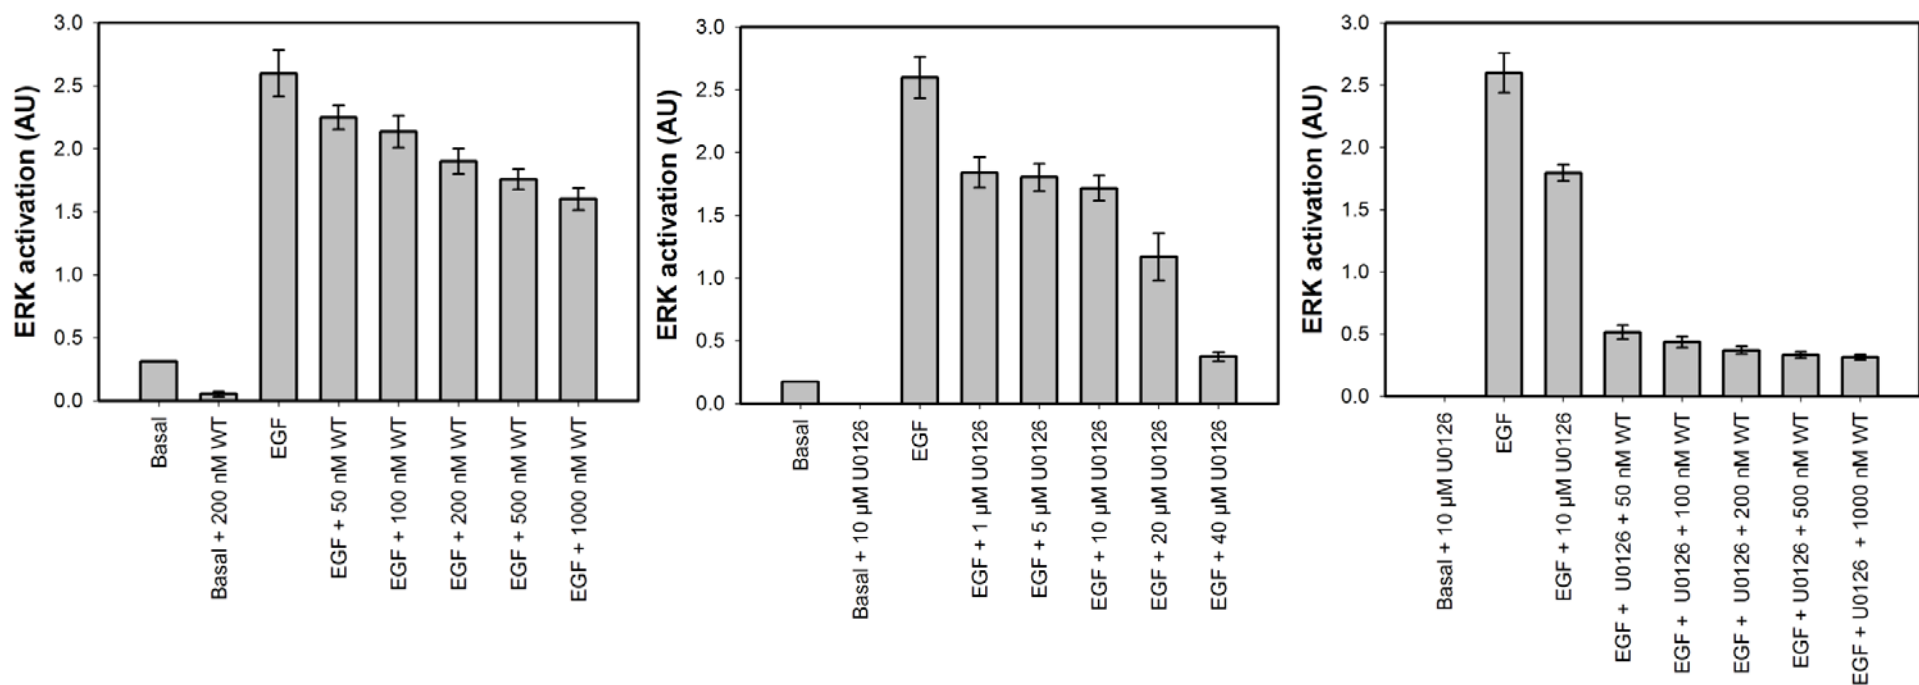

**Fig. 4S. Dose-dependence of ERK phosphorylation in the presence of wortmannin (left panel), U0126 (middle panel) or their combination (right panel).** Serum-starved T47D cells were either left untreated or treated with indicated concentrations of wortmannin, U0126 or their combination for 30 min before stimulation with EGF (1 nM) for 30 min. Equal amounts of total cell lysates were resolved by NuPAGE and subjected to Western blotting. Immunoblots were probed with anti-phospho-p44/42 MAPK (Erk1/2) (Thr202/Tyr204) or anti-ERK1/2 (loading control) antibodies. Bars show the intensities of ERK activation in arbitrary units (AU) plotted as the ratio between phospho-ERK1/2 and total ERK1/2 signal  $\pm$ SD (error bars) (n=3).

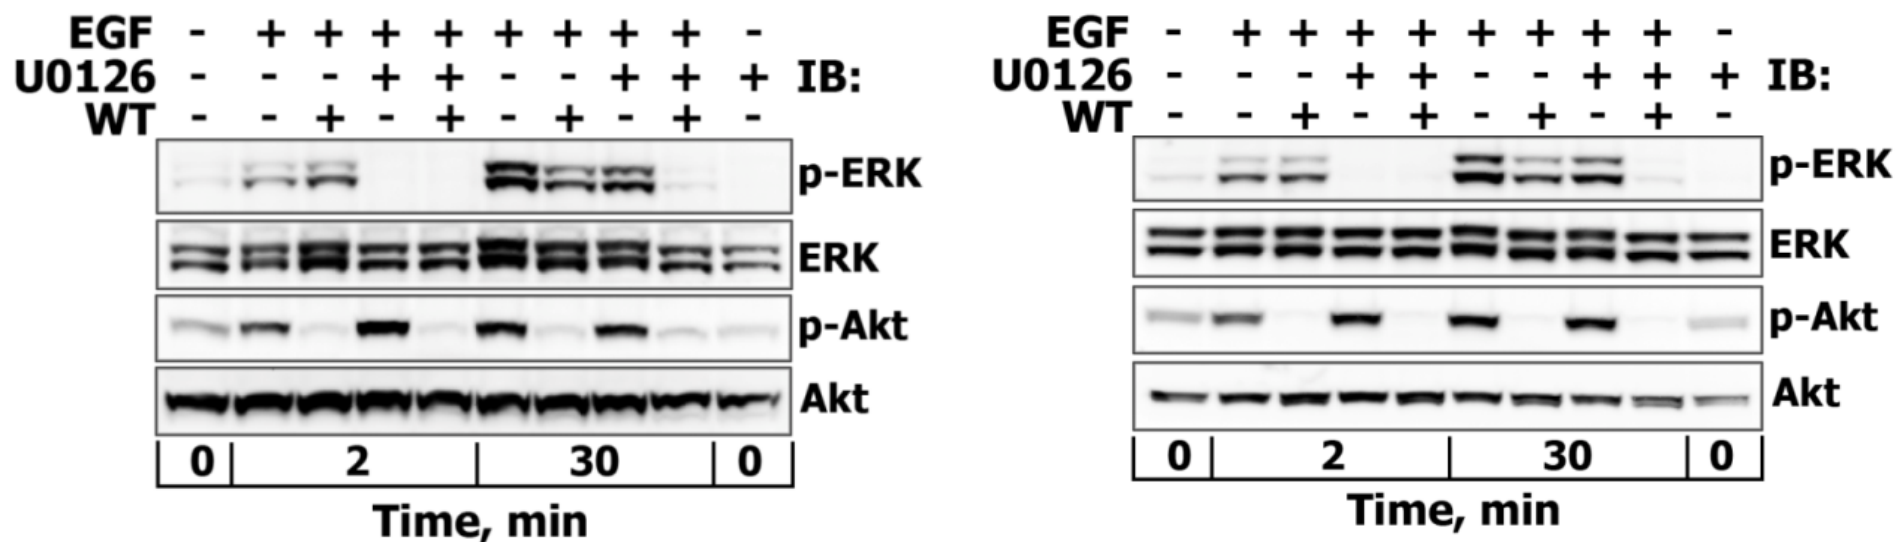

**Fig. 5S.** Activation of ERK and Akt in the presence of wortmannin, U0126 and their combination in non-soluble (left panel) and cytosolic (right panel) fractions. Serum-starved T47D cells were either left untreated or treated with wortmannin (200 nM), U0126 (10  $\mu$ M) or their combination for 30 min before stimulation with EGF (1 nM) for 2 or 30 min. The subcellular fractions were isolated from digitonin-permeabilized (150  $\mu$ g/ml, 10 min) T47D cells. Subcellular fractions were resolved by LDS-PAGE and subjected to immunoblotting (IB) with antibodies against phospho-ERK1/2, ERK1/2, phospho-Akt (Ser473) or Akt proteins.

A.

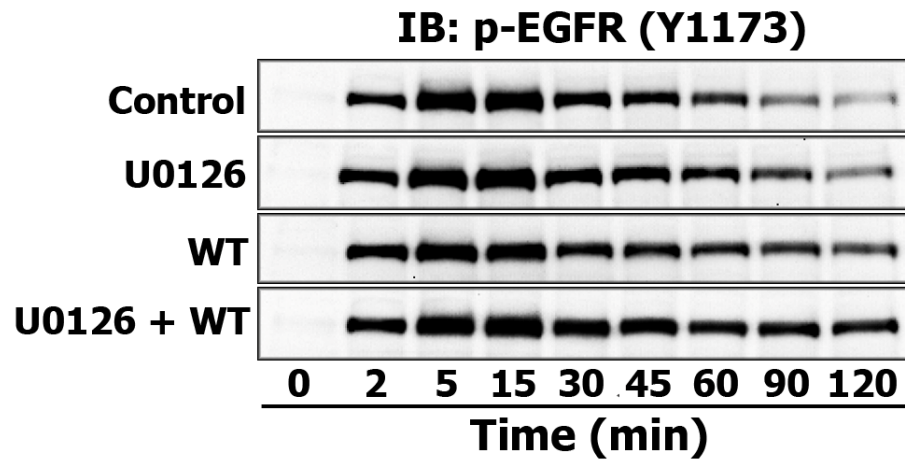

B.

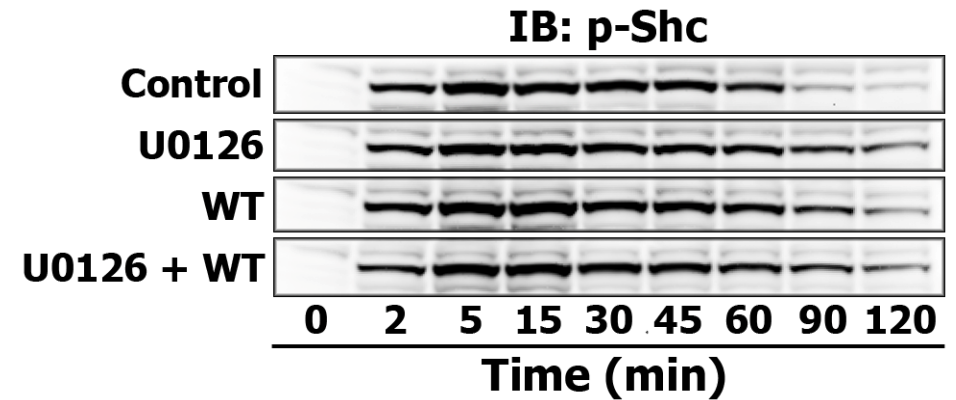

C.

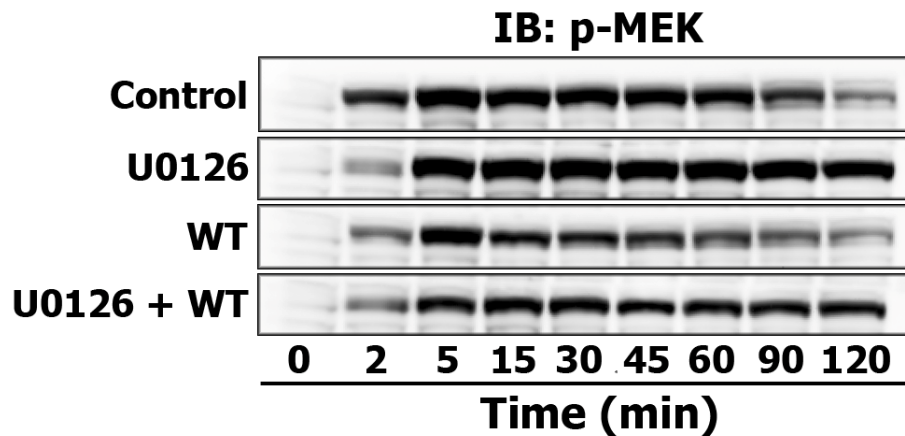

D.

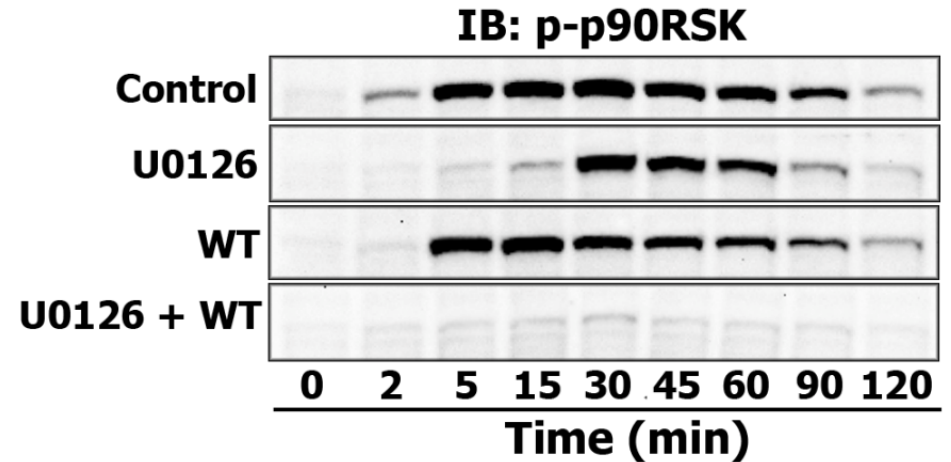

**Fig. 6S. Phosphorylation kinetics of EGFR (A), Shc (B), MEK (C) and p90RSK (D) in the presence of wortmannin, U0126 or their combination.** Serum-starved T47D cells were either left untreated or treated with wortmannin (200 nM), U0126 (10  $\mu$ M) or their combination for 30 min before stimulation with EGF (1 nM) for indicated time intervals (min). Equal amounts of total cell lysates were resolved by NuPAGE and subjected to Multi-strip Western blotting. Immunoblots (IB) were probed with anti-phospho-EGFR (Tyr1173), anti-phospho-Shc (Tyr317), anti-phospho-MEK1/2 (Ser217/221) or anti-phospho-p90RSK (Ser380) antibodies.

**Table S1.** Inhibitors, their IC<sub>50</sub> values, final concentrations and preincubation times used in this study.

| Name       | Target                                | Manufacturer                             | IC <sub>50</sub> values | Final concentration | Preincubation time (min) |
|------------|---------------------------------------|------------------------------------------|-------------------------|---------------------|--------------------------|
| U0126      | MEK1/2                                | Calbiochem/EMD Chemicals (Gibbstown, NJ) | 72/58 nM                | 10 μM               | 30                       |
| Wortmannin | PI3K                                  |                                          | 1-10 nM                 | 200 nM              |                          |
| Gö6850     | PKC α-, β1-, β2-, γ-, δ-, ε- isozymes |                                          | Ki = 10 nM              | 5 μM                | 60                       |
| Gö6983     | PKC α-, β-, γ-, δ-, ζ- isozymes       |                                          | 7/7/6/10/60 nM          |                     |                          |
| Akt-VIII   | Akt1/2/3 isoforms                     |                                          | 58/210/2120 nM          |                     |                          |
| Su6656     | Src/Yes/Lyn/Fyn                       |                                          | 280/20/130/170 nM       | 10 μM               |                          |
| Endothall  | PP2A/PP1 phosphatases                 |                                          | 90/5000 nM              | 2 μM                |                          |
| PD 198306  | MEK1/2                                | Tocris Bioscience (Ellisville, MO)       | 8 nM                    | 200 nM              | 30                       |
| SQ22536    | Adenylyl cyclase                      |                                          | 1.4 μM                  | 50 μM               | 60                       |
| NSC 95397  | Cdc25A/B/C phosphatases               |                                          | Ki = 32 nM              | 5 μM                |                          |
| PP2        | Src-family kinases                    |                                          | 4-5 nM                  |                     | 30                       |
| OSU-03012  | PDK1                                  | Echelon Biosciences (Salt Lake City, UT) | 5 μM                    | 50 μM               | 60                       |
| PD 098059  | MEK1/2                                |                                          | 2-7 μM                  |                     | 30                       |
| PD 169316  | p38 MAPK                              | Cayman Chemical (Ann Arbor, MI)          | 89 nM                   | 5 μM                | 60                       |
| AG-825     | ErbB2/EGFR/PDGFR                      |                                          | 0.35/19/40 μM           |                     |                          |
| SB 216763  | GSK-3 α/β isoforms                    |                                          | 34 nM                   | 7 μM                | 60                       |

**Table S2.** Primary and secondary antibodies and their dilutions used in this study.

| Antibody name and clone                                   | Referred in figures as   | Host species | Dilution  | Manufacturer                                   | Catalog No.                             |                                               |
|-----------------------------------------------------------|--------------------------|--------------|-----------|------------------------------------------------|-----------------------------------------|-----------------------------------------------|
| Phospho-Shc (Tyr317)                                      | p-Shc                    | Rabbit       | 1 : 1000  | Cell Signaling Technology (Danvers, MA)        | 2431                                    |                                               |
| Phospho-EGFR (Tyr1173) (53A5)                             | p-EGFR                   |              |           |                                                | 4407                                    |                                               |
| Phospho-p44/42 MAPK (E10) (Thr202/Tyr204 & Thr204/Tyr187) | p-ERK or p-ERK (Tyr/Thr) | 9106         |           |                                                |                                         |                                               |
| p44/42 MAPK (ERK1/2)                                      | ERK                      | 9102         |           |                                                |                                         |                                               |
| Phospho-ERK1/2 (Thr202)                                   | p-ERK (Thr)              | 1 : 500      |           | Santa Cruz Biotechnology (Santa Cruz, CA)      | sc-101760                               |                                               |
| Phospho-MEK1/2 (Ser217/Ser221)                            | p-MEK                    | Rabbit       |           | 1 : 1000                                       | Cell Signaling Technology (Danvers, MA) | 9121                                          |
| MEK1/2                                                    | MEK                      |              |           |                                                |                                         | 9122                                          |
| Phospho-Akt1/2/3 (Ser473)                                 | p-Akt                    |              |           |                                                |                                         | 9271                                          |
| Akt1/2/3                                                  | Akt                      |              |           |                                                |                                         | 9272                                          |
| Phospho-c-Raf (Ser338) (56A6)                             | p-c-Raf                  |              |           |                                                | 1 : 2000                                | Upstate/Millipore Corporation (Billerica, MA) |
| Raf-1                                                     | c-Raf                    |              | 07-396    |                                                |                                         |                                               |
| Phospho-p90RSK (Ser380) (9D9)                             | p-p90RSK                 |              | 1 : 500   |                                                | Cell Signaling Technology (Danvers, MA) | 9335                                          |
| Phospho-STAT3 (Ser727)                                    | p-STAT3                  |              |           |                                                |                                         | 9134                                          |
| Phospho-Estrogen receptor $\alpha$ (Ser118)               | p-ER- $\alpha$           | 2515         |           |                                                |                                         |                                               |
| GAPDH (6C5)                                               | GAPDH                    | Mouse        | 1 : 2000  | Chemicon/Millipore Corporation (Billerica, MA) | MAB374                                  |                                               |
| c-Fos (H-125)                                             | c-Fos                    | Rabbit       | 1 : 500   | Santa Cruz Biotechnology (Santa Cruz, CA)      | sc-7202                                 |                                               |
| GRB2 (C-23)                                               | Grb2                     |              |           | sc-255                                         |                                         |                                               |
| Phospho-Elk-1 (Ser383)                                    | p-Elk-1                  |              |           | Assay Designs Inc. (Ann Arbor, MI)             | KAP-MA035                               |                                               |
| c-Myc (9E10)                                              | c-Myc                    | Mouse        | 1 : 2000  | BD Biosciences (San Jose, CA)                  | 551101                                  |                                               |
| Anti-mouse HRP-linked IgG                                 | N/A                      | Horse        | 1 : 10000 | Cell Signaling Technology (Danvers, MA)        | 7076                                    |                                               |
| Anti-rabbit HRP-linked IgG                                | N/A                      | Goat         | 1 : 50000 | Pierce/Thermo Fisher Scientific (Rockford, IL) | 31462                                   |                                               |
